# Supplementary material
Source: publisher site journal article supplement (https://www.dovepress.com/article/278954)

**Supplementary material**

Figure S1: The endogenous levels of let-7a-5p in hepatoma cells detected by qPCR(a,b). The expression level of let-7a-5p after transfection of let-7a-5p control, let-7a-5p minic, shControl and sh-let-7a-5p, respectively. * indicates that the difference between the treated and control cells was statistically significant (P < 0.05). ** indicates that the difference between the treated and control cells was statistically significant (P < 0.01).


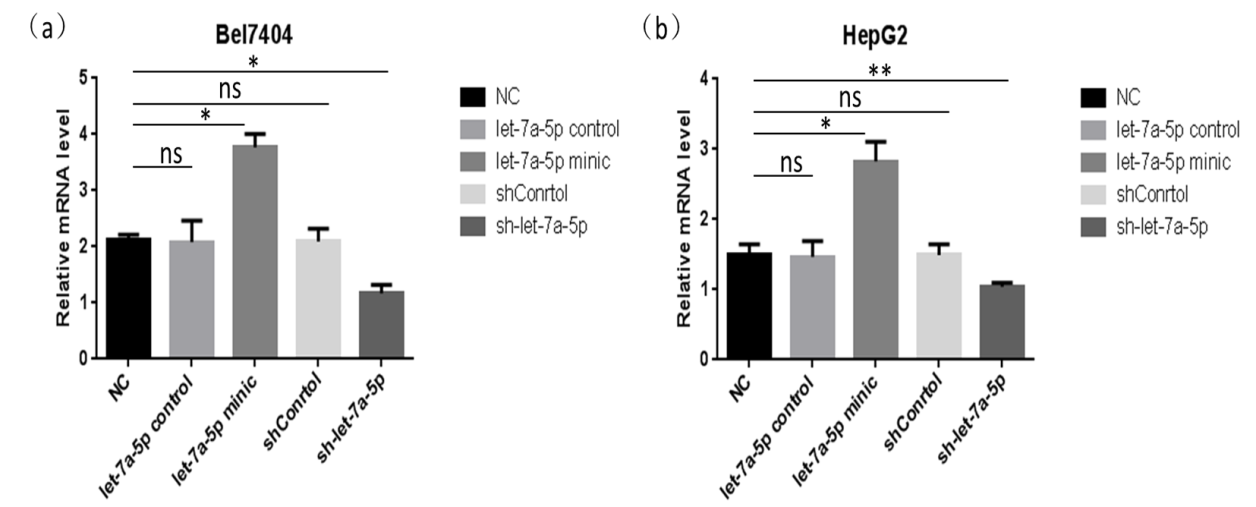

Supplement: Supplementary file 1 [file get_supplementary_file.php]
